# Supplementary material
Source: Springer Nature journal article supplement (https://www.springermedizin.de/resource/supplementary/13002_2007_109_MOESM11_ESM.pdf/9627226)

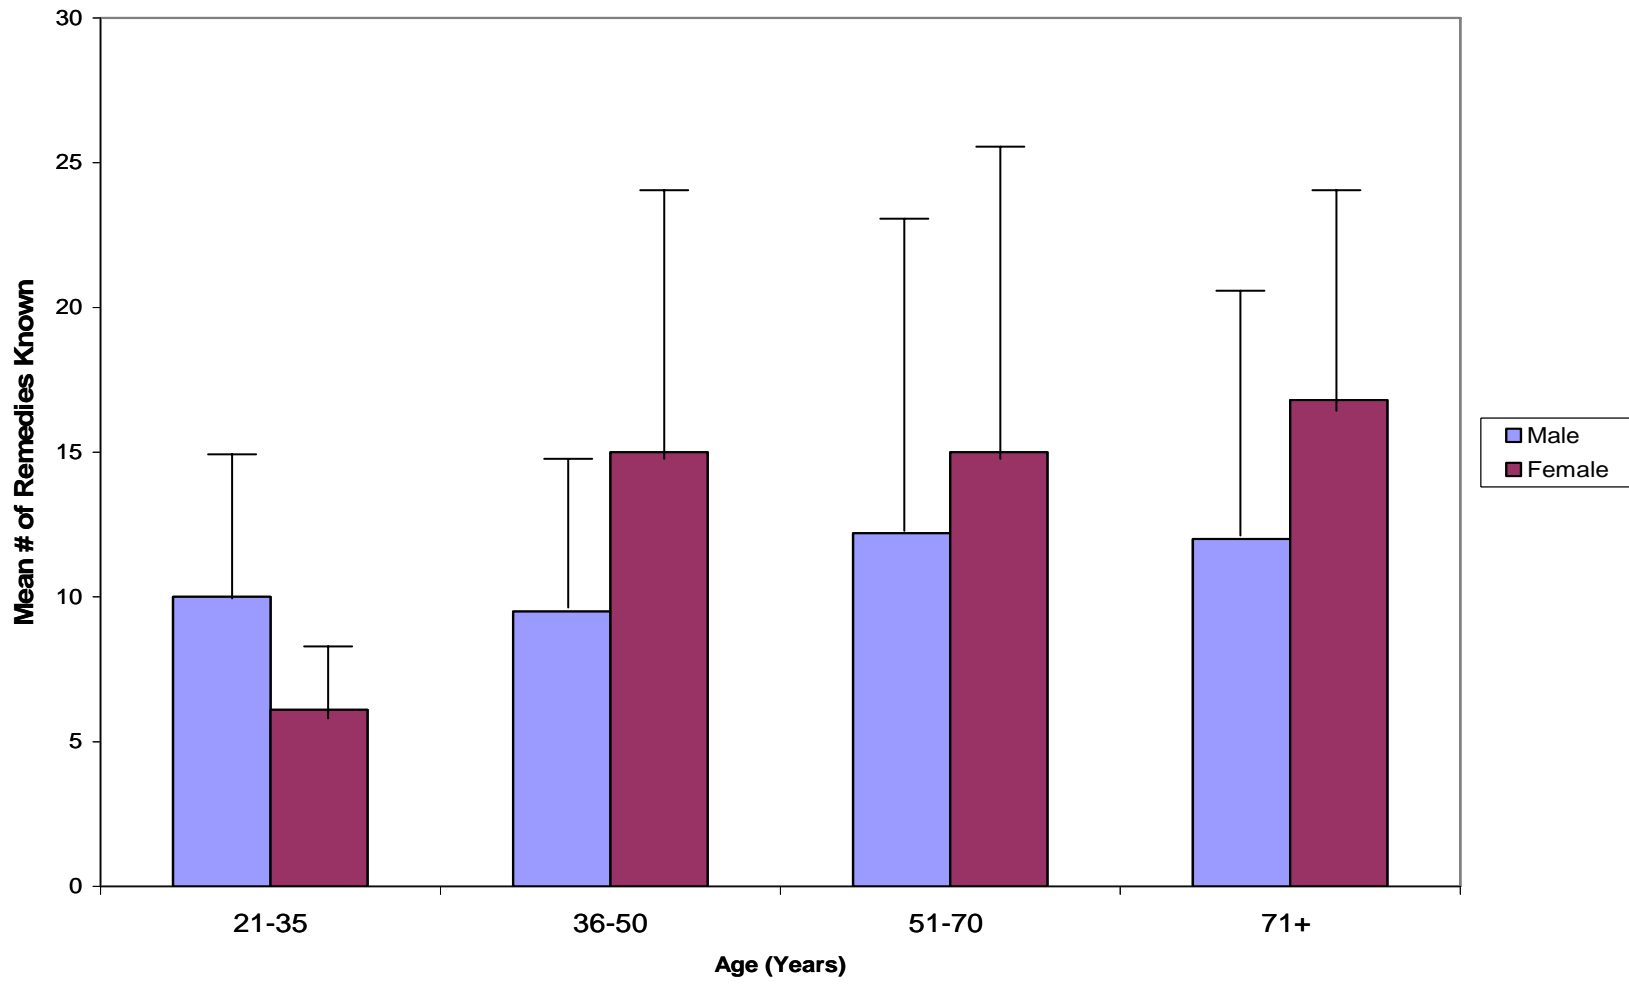

Supplement: MOESM11 [file 9627226]
